# Supplementary material for: CMV-Specific Immune Response—New Patients, New Insight: Central Role of Specific IgG during Infancy and Long-Lasting Immune Deficiency after Allogenic Stem Cell Transplantation
Source: MDPI journal article supplement (doi:10.3390/ijms20020271), 2019-01-11
Supplement: s1 [file s1]

## Supplementary Material

**Table S1.** List of CMV T-cell epitopes used in the quantiferon technique.

| Epitope Sequence | HLA Restriction | Epitope Code | Antigen |
|------------------|-----------------|--------------|---------|
| IMREFNSYK        | A3              | IMR          | gB      |
| VLEETSVML        | A2              | VLE          | IE-1    |
| QIKVRVDMV        | B8              | QIK          | IE-1    |
| AYAQKIFKIL       | A23&A24         | AYA          | IE-1    |
| FEQPTETPP        | B41             | FEQ          | IE-2    |
| VTEHDTLLY        | A1              | VTE          | pp50    |
| TPRVTGGGAM       | B7              | TPR          | pp65    |
| QYDPVAALF        | A24             | QYD          | pp65    |
| QMWQARLTV        | B52             | QMW          | pp65    |
| QEFFWDANDI       | B44             | QEF          | pp65    |
| QAIRETVEL        | B57&B58         | QAI          | pp65    |
| PFTSQYRIQGKL     | A24             | FTS          | pp65    |
| NLVPMVATV        | A2              | NLV          | pp65    |
| KMQVIGDQY        | B40/60          | KMQ          | pp65    |
| GPISGHVLK        | A11             | GPI          | pp65    |
| FPTKDVAL         | B35             | FPT          | pp65    |
| DIYRIFAEL        | A26             | DIY          | pp65    |
| DALPGPCI         | B51             | DAL          | pp65    |
| CPSQEPMSIYVY     | B35             | CPS          | pp65    |
| CEDVPSGKL        | B40/60          | CED          | pp65    |
| ARVYEIKCR        | B27             | ARV          | pp65    |

Current immunoassays use a broad spectrum of CMV-antigen types (synthetic peptides, viral lysates, recombinant antigens). However, such materials have, to date, not been issued as an official WHO standard. Of note, in quantiferon analysis, most of the epitopic peptides are derived from **pp65** (i.e. 15 to highlight presented in the bold font), but only one was epitope from immunodominant surface glycoprotein B (**gB**), sometimes used in the pentamer technique. Most notably, HLA specificities are not uniformly distributed e.g., only one **HLA-A3**-restricted epitope (**blue**), contrary to 3 **-HLA-A24**-restricted (**red**). It may be a source of inter-individual variation. Under the assumption of the quantiferon technique, such HLA-restricted CMV epitopes acts via TCR to activate T cell immune response and cytokine release. Limitations of CMV-interferon gamma release assay (IGRA) and a high rate of intermediate results [11,13,14,32] were described, but IL-2 as a T cell specific cytokine yielded inferior results and was negligible as a surrogate marker [32]. The IFN $\gamma$  release was significantly higher (1324 or 5871 pg/mL) than IL-2 (44 or 883 pg/mL) under the influence of recombinant or synthetic pp65 peptides [32].
